# Supplementary material
Source: PubMed Central journal article supplement (PMC6763225)
Supplement: jci-129-127021-s039.pdf [file jci-129-127021-s039.pdf]

## Supplemental Data

### **mTORC1 to AMPK Switching Underlies $\beta$ -Cell Metabolic Plasticity During Maturation and Diabetes**

Rami Jaafar, Stella Tran, Ajit Shah, Gao Sun, Martin Valdearcos, Piero Marchetti, Matilde Masini, Avital Swisa, Simone Giacometti, Ernesto Bernal-Mizrachi, Aleksey Matveyenko, Matthias Hebrok, Yuval Dor, Guy A. Rutter, Suneil K. Koliwad\*§, and Anil Bhushan\*§.

\* equal contribution.

§ co-corresponding authors

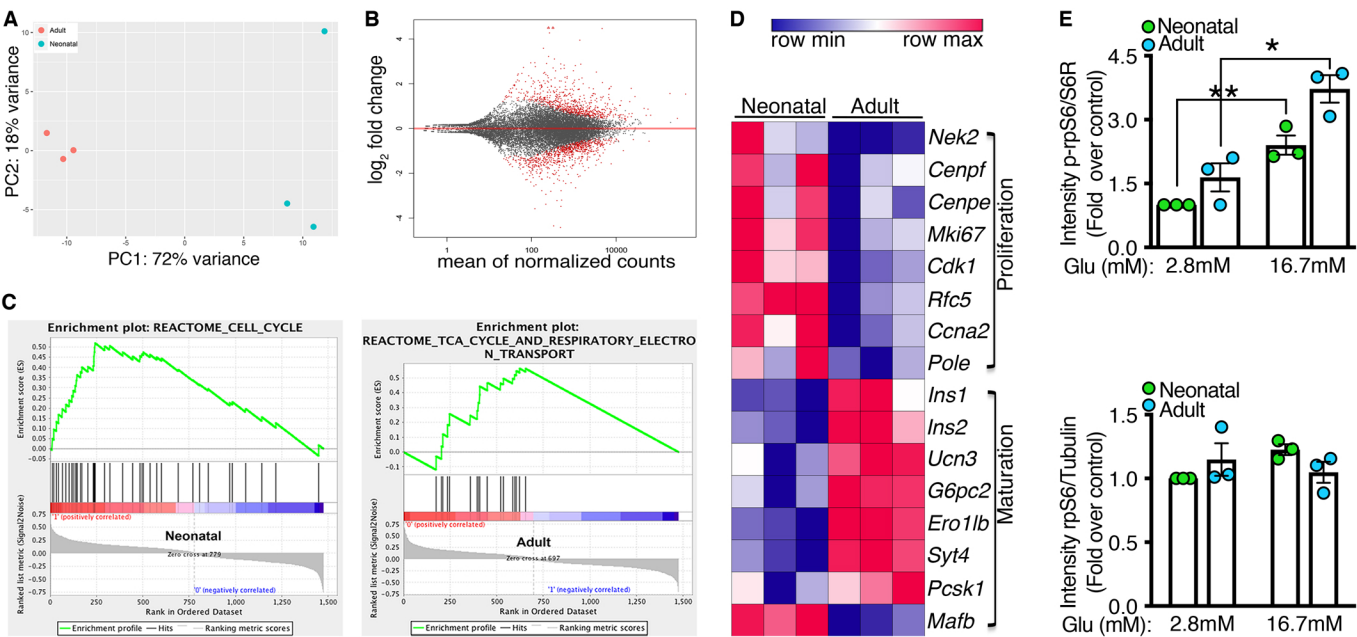

**Supplemental Figure 1. A.** Principal components analysis (PCA) of RNAseq libraries from P6 and P45 pancreatic  $\beta$ -cells. **B.** Plot of normalized mean expression counts vs. log<sub>2</sub>-fold change for P6 vs. P45  $\beta$ -cells. **C.** GSEA of RNAseq data, showing enrichment by reactome cell cycle pathway genes in neonatal  $\beta$ -cells, and instead, enrichment by reactome TCA cycle and respiratory electron transport chain genes in adult  $\beta$ -cells ( $p < 0.05$ ). **D.** Heatmap, showing  $\beta$ -cell transcriptional profiles including relative upregulation of genes related to proliferation at P6 and maturation at P45 ( $p < 0.05$ ). **E.** Quantification of data in Figure 1E, with p-rpS6 normalized to total rpS6 (top) and total rpS6 normalized to tubulin (bottom). \*\* $p = 0.006$  \* $p = 0.0109$  (unpaired t-test corrected for multiple comparison using Holm-Sidak method).

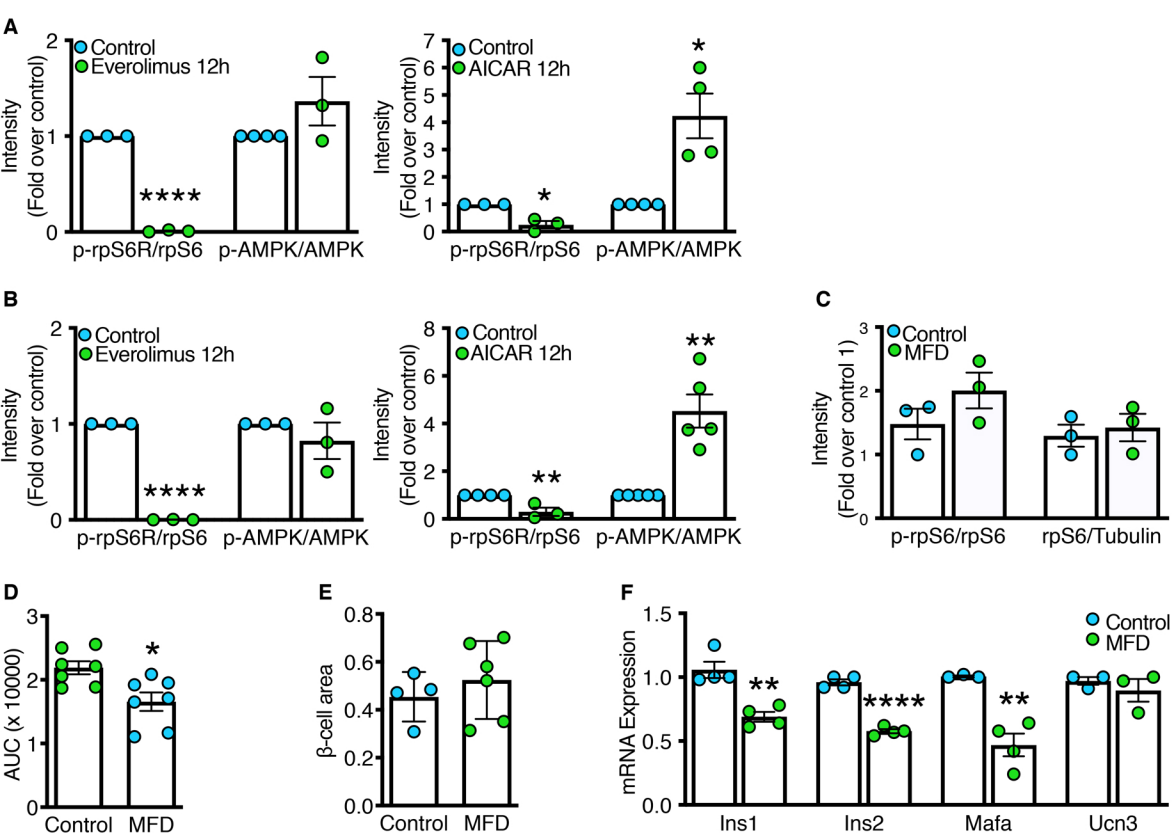

**Supplemental Figure 2. A.** Quantification of the immunoblots in Figure 2A for p-rpS6 and p-AMPK performed on mouse islets treated for 12 hours with 40 $\mu$ M everolimus (left) or 1mM AICAR (right) normalized to total rpS6 or total AMPK, respectively (n=3 per group). \* p= 0.0104, \*\*\*\*p < 0.0001 (unpaired t-test corrected for multiple comparison using Holm-Sidak method). **B.** Quantification of the immunoblots in Figure 2B for p-rpS6 and p-AMPK performed on human islets treated for 12 hours with 40 $\mu$ M everolimus (left) or 1mM AICAR (right) normalized to total rpS6 or total AMPK, respectively (n=3 per group). \*\*p= 0.0051 \*\* p= 0.0018, and \*\*\*\*p < 0.0001 (unpaired t-test corrected for multiple comparison using Holm-Sidak method). **C.** Quantification of data in Figure 2D, showing p-rpS6 normalized to total rpS6 and total rpS6 normalized to tubulin. **D.** Figure 2E corresponding area under the curve n=7. \*p= 0.011 (two-tailed unpaired t-test). **E.** Calculated  $\beta$ -cell area in islets from control mice and MFD mice (n=5-6). p= 0.4720 (two-tailed unpaired t-test). **F.** qPCR, showing relative mRNA levels of  $\beta$ -cell maturation markers in control and MFD mice n=3-4. \*\*p= 0.008, \*\*\*\*p<0.0001 (unpaired t-test corrected for multiple comparison using Holm-Sidak method).

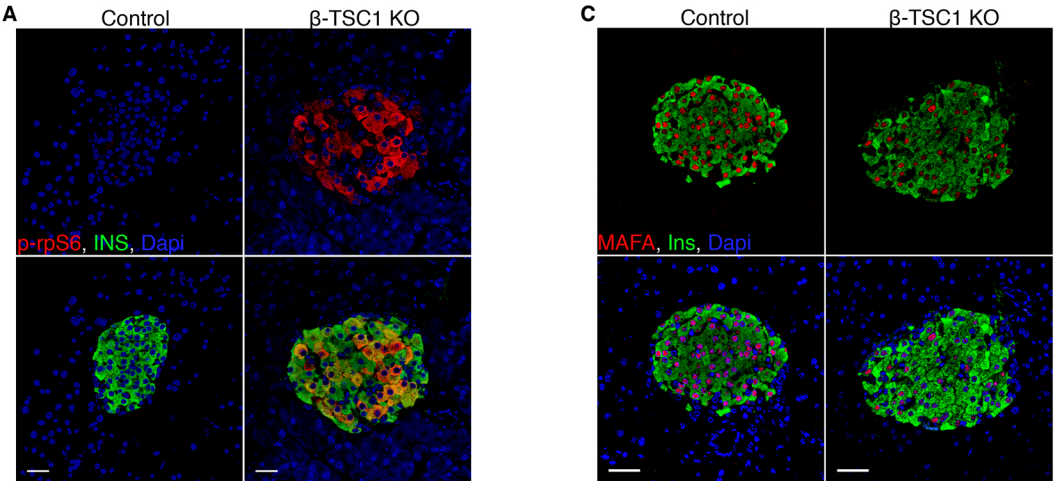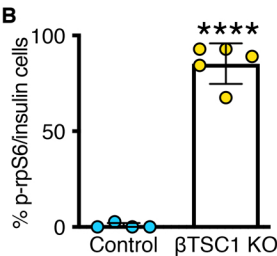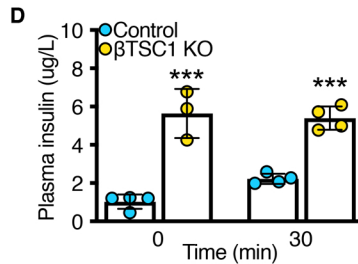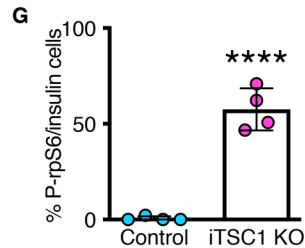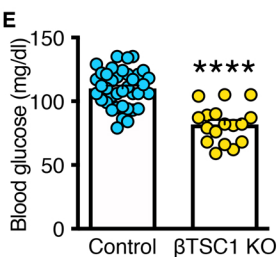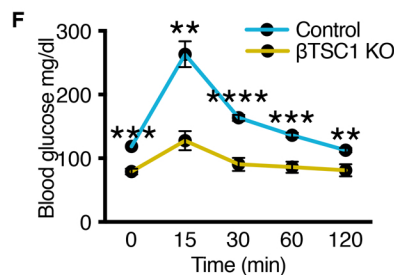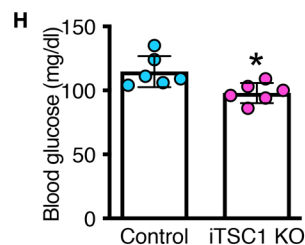

**Supplemental Figure 3. A.** Immunostaining for insulin (green), p-rpS6 (red), and DAPI (blue) in representative pancreatic sections from control and  $\beta$ -TSC1KO mice (scale bar: 50  $\mu$ m). **B.** Percentage of  $\beta$ -cells positive for both p-rpS6 and insulin in adult  $\beta$ -TSC1KO and control mice ( $n=4-5$ ). \*\*\*\* $p<0.0001$  (two-tailed unpaired t-test). **C.** Immunostaining for insulin (green), MafA (red) and DAPI (blue) in representative pancreatic sections from adult  $\beta$ -TSC1KO and control mice (scale bar: 50  $\mu$ m). **D.** Plasma insulin levels after glucose challenge in  $\beta$ -TSC1KO and control mice ( $n=5$ ), \*\*\* $p=0.0009$  and \*\*\* $p=0.00015$  (unpaired t-test corrected for multiple comparison using Holm-Sidak method). **E.** Fasting blood glucose levels in  $\beta$ -TSC1KO mice and littermate controls ( $n=17-38$ ) \*\*\*\* $p<0.0001$  (two-tailed unpaired t-test). **F.** IPGTTs for  $\beta$ -TSC1 KO mice and littermate controls ( $n=4-11$ ). \*\* $p<0.01$ , \*\*\*\* $p<0.0001$ , and \*\*\*\* $p<0.0001$  (unpaired t-test corrected for multiple comparison using Holm-Sidak method). **G.** Percentage of cells positive for both p-rpS6 and insulin in islets from iTSC1KO and control mice ( $n=4$ ). \*\*\*\* $p<0.0001$  (two-tailed unpaired t-test). **H.** Fasting blood glucose levels in iTSC1KO mice and littermate controls ( $n=6$ ). \*\* $p=0.0173$  (two-tailed unpaired t-test).

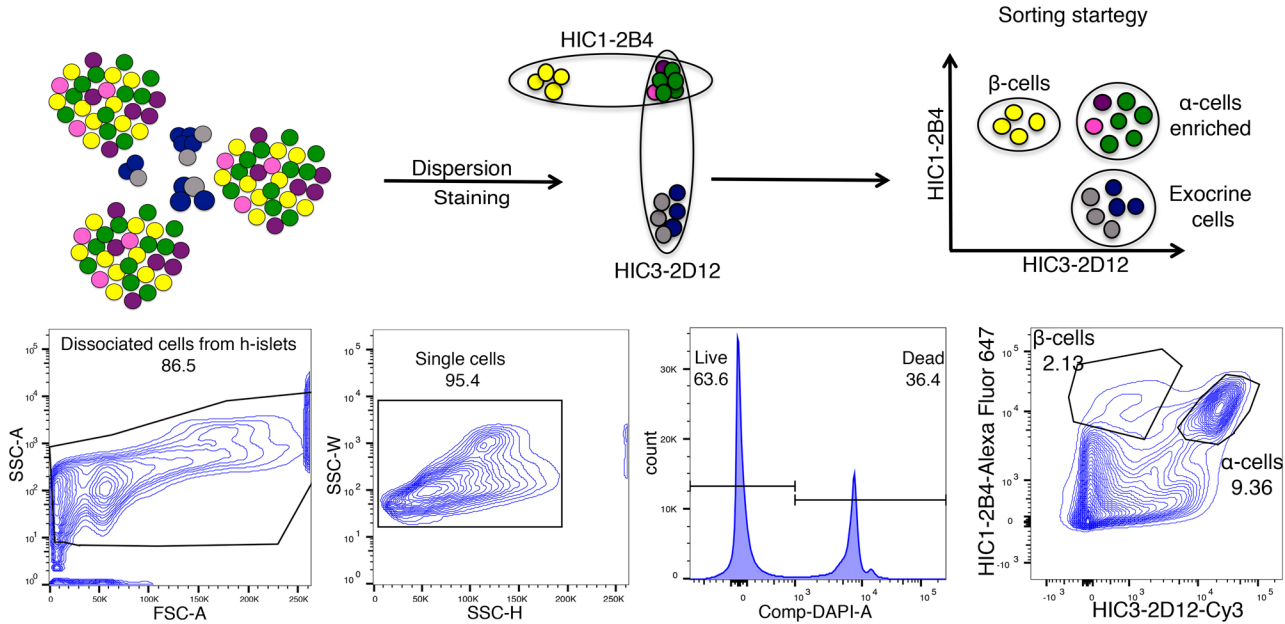

**Supplemental Figure 4.** Gating strategy for sorting  $\beta$ -cells from human islets.

**Supplemental table 1**

Log2 fold changes and associated p-value for genes presented in the heatmap shown in supplemental Fig 1D

| Gene name    | Log2 fold change | p-value    |
|--------------|------------------|------------|
| <i>Nek2</i>  | -1.339034306     | 0.00941881 |
| <i>Cenpf</i> | -0.977890623     | 0.03495696 |
| <i>Cenpe</i> | -1.212366861     | 0.02397859 |
| <i>Mki67</i> | -1.192655003     | 2.26E-005  |
| <i>Cdk1</i>  | -1.433178469     | 0.00792847 |
| <i>Rfc5</i>  | -1.528949667     | 0.00258173 |
| <i>Ccna2</i> | -1.528532817     | 0.00103548 |
| <i>Pol2</i>  | -1.289185581     | 0.02712927 |
| <i>Ins1</i>  | 1.566120644      | 2.68E-012  |
| <i>Ins2</i>  | 1.540292745      | 5.16E-014  |
| <i>Ucn3</i>  | 1.257778699      | 3.58E-006  |
| <i>G6pc2</i> | 1.425826996      | 5.60E-012  |
| <i>Ero1b</i> | 1.19744314       | 1.04E-016  |
| <i>Syt4</i>  | 1.81888941       | 3.14E-016  |
| <i>Pcsk1</i> | 0.455240727      | 0.04116302 |
| <i>Mafb</i>  | -1.753123494     | 1.19E-016  |

**Supplemental table 2**

Log2 fold changes and associated p-value for genes presented in the heatmap shown in Figure 1B

| Gene name      | Log2 fold change | p-value    |
|----------------|------------------|------------|
| <i>Igf2</i>    | -1.669744396     | 0.00535097 |
| <i>Irs1</i>    | -1.009097768     | 0.0049805  |
| <i>Igf1r</i>   | -1.009466088     | 3.26E-005  |
| <i>Igf2bp1</i> | -3.584108315     | 3.16E-013  |
| <i>Igf2bp2</i> | -2.420619212     | 1.32E-016  |
| <i>Igf2bp3</i> | -4.351045752     | 1.71E-027  |
| <i>Eif4g1</i>  | -0.496406801     | 0.00311579 |
| <i>Eif3b</i>   | -0.518685897     | 0.0341385  |
| <i>Eif4h</i>   | -0.614698641     | 0.00934488 |
| <i>Eif4a3</i>  | -0.701346773     | 0.01070156 |
| <i>Eif4a1</i>  | -0.867112366     | 0.01129465 |
| <i>Rps6ka2</i> | -0.466920254     | 0.0290266  |
| <i>Foxo1</i>   | -0.709903032     | 0.01876581 |
| <i>Prkaa2</i>  | 1.951447958      | 5.23E-005  |
| <i>Pten</i>    | 0.58453832       | 0.00173429 |

**Supplemental table 3**

Log2 fold changes and associated p-value for genes presented in the heatmap shown in Figure 3E

| Gene name     | Log2 fold change | p-value  |
|---------------|------------------|----------|
| <i>Ins1</i>   | -3.738244171     | 8.72E-37 |
| <i>Ins2</i>   | -5.099994098     | 6.81E-54 |
| <i>Ucn3</i>   | -2.693629409     | 1.66E-14 |
| <i>G6pc2</i>  | -3.299783607     | 1.94E-28 |
| <i>Ero1lb</i> | -2.875381609     | 2.53E-21 |
| <i>Syt4</i>   | -3.447526233     | 7.78E-15 |
| <i>Pcsk1</i>  | -2.47241789      | 4.60E-08 |
| <i>Mafa</i>   | -2.5436652       | 1.14E-05 |



**Supplemental table 4**

Log2 fold changes and associated p-value for genes presented in the heatmap shown in Figure 4A

| Gene name      | Log2 fold change | p-value    |
|----------------|------------------|------------|
| <i>mt-Co1</i>  | 0.901261886      | 1.66E-005  |
| <i>mt-Co2</i>  | 1.257060123      | 0.00234427 |
| <i>mt-Co3</i>  | 0.70901422       | 0.01370815 |
| <i>mt-Cytb</i> | 1.133039722      | 2.56E-006  |
| <i>mt-Nd1</i>  | 0.896537131      | 0.01299598 |
| <i>mt-Nd2</i>  | 0.749238012      | 0.03711852 |
| <i>mt-Nd4</i>  | 1.150902649      | 0.00212917 |
| <i>mt-Nd5</i>  | 0.848395287      | 0.00056296 |
| <i>mt-Atp6</i> | 0.980945583      | 0.0206238  |
| <i>Atp5e</i>   | 1.478860056      | 0.00308137 |
| <i>Atp6ap1</i> | 0.622265079      | 0.01749909 |
| <i>Cox5b</i>   | 0.809685423      | 0.01566565 |
| <i>Cox6a2</i>  | 2.706722493      | 4.16E-008  |
| <i>Cox7b</i>   | 1.048435595      | 0.00300421 |
| <i>Cyb5a</i>   | 0.865927615      | 0.00806819 |
| <i>Ndufa3</i>  | 1.294458592      | 0.02502589 |
| <i>Uqcrh</i>   | 1.231889143      | 0.00128698 |
| <i>Uqcrq</i>   | 1.226963434      | 1.30E-005  |

**Supplemental table 5**

Log2 fold changes and associated p-value for genes presented in the heatmap shown in Figure 4E

| Gene name       | Log2 fold change | p-value    |
|-----------------|------------------|------------|
| <i>mt-Co1</i>   | -0.868310802     | 1.18E-11   |
| <i>mt-Co2</i>   | -0.911171573     | 1.18E-12   |
| <i>mt-Co3</i>   | -0.880341761     | 1.29E-25   |
| <i>mt-Nd1</i>   | -0.726717508     | 6.48E-08   |
| <i>mt-Nd2</i>   | -0.937632202     | 3.18E-12   |
| <i>mt-Nd4</i>   | -0.95314497      | 1.21E-13   |
| <i>mt-Nd5</i>   | -1.010724448     | 2.41E-16   |
| <i>mt-Atp6</i>  | -0.90594167      | 5.55E-22   |
| <i>Atp8</i>     | -0.844959725     | 2.59E-14   |
| <i>Atp2a2</i>   | -0.473449972     | 0.00017864 |
| <i>Atp6ap2</i>  | -0.611224628     | 3.96E-10   |
| <i>Atp6v1e1</i> | -0.45885391      | 5.04E-09   |
| <i>Atp6v1d</i>  | -0.486891211     | 2.99E-24   |
| <i>Cox7a2l</i>  | -0.506881364     | 0.0003437  |
| <i>Cox6a2</i>   | -0.722191874     | 0.0003903  |
| <i>Ppargc1a</i> | -0.523333512     | 0.039      |
| <i>Ppargc1b</i> | -0.397202902     | 0.06413312 |

**Supplemental table 6**

Log2 fold changes and associated p-value for genes presented in the heatmap shown in Figure 5A

| Gene name       | Log2fold change | p value    |
|-----------------|-----------------|------------|
| <i>mTor</i>     | 0.780377302     | 0.01287027 |
| <i>Akt1</i>     | 0.705019398     | 0.00125506 |
| <i>Igf1r</i>    | 0.970627039     | 0.00736922 |
| <i>Igf2r</i>    | 1.438017002     | 1.76E-09   |
| <i>Rps6ka1</i>  | 1.20304205      | 0.00902307 |
| <i>Rps6ka2</i>  | 0.618403979     | 0.04289504 |
| <i>Rps6ka4</i>  | 0.919014983     | 0.00025866 |
| <i>Pdk1</i>     | 1.094459248     | 0.00210561 |
| <i>Eif4a3</i>   | 0.938303261     | 0.00085781 |
| <i>Eif4ebp1</i> | 1.63063821      | 3.61E-07   |
| <i>Eif4g1</i>   | 0.508975641     | 0.02180279 |
| <i>Eif4h</i>    | 0.474795353     | 0.04136719 |
| <i>Eif4b</i>    | 1.188249422     | 4.29E-07   |
| <i>Eif4a3</i>   | 0.938303261     | 0.00085781 |
| <i>Pik3r5</i>   | 2.298347767     | 1.41E-07   |
| <i>Ulk1</i>     | 1.155388941     | 3.27E-06   |
| <i>Ambra1</i>   | 0.7668819       | 0.00379013 |
| <i>Rptor</i>    | 1.162070397     | 8.44E-06   |
| <i>Prkaa1</i>   | -0.887260688    | 0.00629938 |
| <i>Ppp2ca</i>   | -1.251862877    | 8.82E-07   |
| <i>Fkbp1a</i>   | -0.665205399    | 0.0046429  |
| <i>Fkbp1b</i>   | -2.189758461    | 2.40E-21   |
| <i>Mapk1</i>    | -0.759869661    | 0.00323474 |
| <i>Ins2</i>     | -0.864623497    | 0.00080844 |
| <i>Ucn3</i>     | -1.093252337    | 6.26E-06   |
| <i>G6pc2</i>    | -0.877497222    | 0.00241343 |
| <i>Ero1b</i>    | -1.817987497    | 5.89E-22   |
| <i>Pcsk1n</i>   | -1.257182893    | 2.31E-08   |

**Supplemental table 7: qPCR primer sequences**

|       | Forword primer          | Reverse primer         |
|-------|-------------------------|------------------------|
| PGC1a | GAATCAAGCCAGTACAGACACCG | CATCCCTCTTGAGCCTTTCGTG |
| PGC1b | CAGCCTCAGTTCCAGAAGTCAG  | CACCGAAGTGAGGTGCTTATGC |
| Ins1  | AGGACCCACAAGTGGAACAAC   | GTGCAGCACTGATCCACAATG  |
| Ins2  | GCTCTCTACCTGGTGTGTGGG   | CTCCACCCAGCTCCAGTTGTG  |
| Ucn3  | AAGCCTCTCCCACAAGTTCTA   | GAGGTGCGTTTGGTTGTCATC  |
| Glut2 | GTTGGAAGAGGAAGTCAGGGCA  | ATCACGGAGACCTTCTGCTCAG |
| Mafa  | TCAGCAAGGAGGTCATCCGA    | TGGCTCTGGAGCTGGCACTTCT |

**Supplemental table 8:** list of disallowed genes.

| Pullen et al.2010 |          |         |
|-------------------|----------|---------|
| HBA               | BLOC1S1  | PFKL    |
| NDRG2             | C1qBP    | PFKP    |
| HBB               | CAT      | H6PD    |
| SLC16A1           | CD302    | PGD     |
| ABCA8A            | COX5A    | RPE     |
| MYL9              | CRLZ1    | ACLY    |
| LY6A              | CXCL12   | ACSS2   |
| CAR2              | FCGRT    | HSD17b7 |
| TST               | HIGD1A   | GDPD1   |
| LY6C              | IGFBP4   | MVK     |
| FXYD1             | ISLR     | SOAT1   |
| SULT1A1           | ITIH5    |         |
| GAS6              | LDHA     |         |
| GDA               | LMO4     |         |
| MGST3             | MAF      |         |
| CXCL12            | MCT1     |         |
| MGLL              | MGST1    |         |
| GSTA4             | MYLK     |         |
| LDHA              | NOLA2    |         |
| PDGFRA            | OAT      |         |
| TNS1              | OGN      |         |
| OAT               | PARP3    |         |
| FGF1              | PCOLCE   |         |
| FAM59A            | PDGFRA   |         |
| CD302             | PRL24    |         |
| NFIB              | PRL36    |         |
| DDAH1             | SELENBP1 |         |
| ASPA              | SMAD3    |         |
| CCL21             | TGM2     |         |
| GAS1              | UQCRB    |         |
| ACOT7             | ZFP36L1  |         |
| NDRG4             | ZYX      |         |
| YAP1              | DNMT3a   |         |
| GALM              | HK1      |         |
| GUCY1A3           | HK2      |         |
| PLEC1             | LDHA     |         |
| AK3               | ALDOB    |         |
| ZDHHC9            | TPI1     |         |
| IGFBP4            | PGM1     |         |
| ZFP622            | PGM2     |         |
| ARHGDIB           | BPGM     |         |

| Thorrez et al. 2011 |
|---------------------|
| ZFP622              |
| ARHGDIB             |
| BLOC1S1             |
| C1qBP               |
| CAT                 |
| CD302               |
| COX5A               |
| CRLZ1               |
| CXCL12              |
| FCGRT               |
| HIGD1A              |
| IGFBP4              |
| ISLR                |
| ITIH5               |
| LDHA                |
| LMO4                |
| MAF                 |
| MCT1                |
| MGST1               |
| MYLK                |
| NOLA2               |
| OAT                 |
| OGN                 |
| PARP3               |
| PCOLCE              |
| PDGFRA              |
| PRL24               |
| PRL36               |
| SELENBP1            |
| SMAD3               |
| TGM2                |
| UQCRB               |
| ZFP36L1             |
| ZYX                 |

| Dhawan et al. 2015 |
|--------------------|
| DNMT3a             |
| HK1                |
| HK2                |
| LDHA               |
| ALDOB              |
| TPI1               |
| PGM1               |
| PGM2               |
| BPGM               |
| PFKL               |
| PFKP               |
| H <sup>^</sup> PD  |
| PGD                |
| RPE                |
| ACLY               |
| ACSS2              |
| HSD17b7            |
| GDPD1              |
| MVK                |
| SOAT1              |
